# Supplementary material for: Open-framework zinc and cobalt phosphates synthesized by the tributylphosphate route
Source: Royal Society of Chemistry journal article supplement (doi:10.1039/b311529a), 2004-01-01
Supplement: b311529a.doc [file b311529a.doc]

# SUPPLEMENTARY INFORMATION

**For**

**Open-Framework Zinc and Cobalt Phosphates Synthesized by the Tributylphosphate Route**

**S. Neeraj**, **C. N. R. Rao and Anthony K. Cheetham**

**Table S1.** Atomic coordinates [ x 104 ] and equivalent isotropic displacement parameters [Å2 x 103] for [C6N2H18][Zn(HPO4)2], **I**.

| Atom | x | y | z | Ueq |
| --- | --- | --- | --- | --- |
| Zn(1) | 2309(2) | 5243(1) | 176(1) | 32(1) |
| P(1) | 266(3) | 5901(1) | -706(1) | 32(1) |
| P(2) | 4273(3) | 4045(1) | -560(1) | 32(1) |
| O(1) | 1016(11) | 4860(4) | 704(2) | 43(2) |
| O(2) | 3092(10) | 4182(4) | -156(2) | 40(2) |
| O(3) | 3955(8) | 6112(4) | 390(2) | 35(2) |
| O(4) | 987(9) | 6061(4) | -220(2) | 40(2) |
| O(5) | 1625(10) | 5717(4) | -1065(2) | 47(2) |
| O(6) | -631(9) | 6800(4) | -850(2) | 42(2) |
| O(7) | 4260(10) | 4886(4) | -884(3) | 47(2) |
| O(8) | 3684(9) | 3182(4) | -826(2) | 42(2) |
| N(1) | -1450(30) | 2441(13) | -1404(6) | 162(8) |
| N(2) | 857(12) | 2580(5) | -273(3) | 43(2) |
| C(1) | -110(20) | 2173(8) | -653(5) | 71(4) |
| C(2) | -540(20) | 2853(8) | -1007(6) | 76(4) |
| C(3) | -2550(60) | 3170(20) | -1664(13) | 300(30) |
| O(100) | 6740(30) | 5655(17) | -1471(9) | 240(11) |
| O(300) | 1480(30) | 6334(18) | -1965(10) | 263(11) |
| O(200) | 3200(40) | 3250(20) | -1810(12) | 308(15) |

**Table S2.** Bond distances and angles in [C6N2H18][Zn(HPO4)2], **I**.

| Moiety | Distance (Å) | Moiety | Angle (°) |
| --- | --- | --- | --- |
| Zn(1)-O(1) | 1.918(7) | O(2)-Zn(1)-O(4) | 112.6(3) |
| Zn(1)-O(2) | 1.920(6) | O(3)-Zn(1)-O(4) | 99.2(3) |
| Zn(1)-O(3) | 1.934(6) | O(1)#1-P(1)-O(4) | 111.7(4) |
| Zn(1)-O(4) | 1.958(6) | O(1)#1-P(1)-O(5) | 111.4(4) |
| P(1)-O(1)#1 | 1.516(7) | O(4)-P(1)-O(5) | 111.4(4) |
| P(1)-O(4) | 1.524(7) | O(1)#1-P(1)-O(6) | 107.3(4) |
| P(1)-O(5) | 1.528(8) | O(4)-P(1)-O(6) | 107.0(4) |
| P(1)-O(6) | 1.552(6) | O(5)-P(1)-O(6) | 107.7(4) |
| P(2)-O(2) | 1.511(7) | O(2)-P(2)-O(3)#2 | 111.6(4) |
| P(2)-O(3)#2 | 1.529(7) | O(2)-P(2)-O(7) | 110.6(4) |
| P(2)-O(7) | 1.535(6) | O(3)#2-P(2)-O(7) | 108.5(4) |
| P(2)-O(8) | 1.542(6) | O(2)-P(2)-O(8) | 106.8(4) |
|  |  | O(3)#2-P(2)-O(8) | 108.9(4) |
| Moiety | Angle (°) | O(7)-P(2)-O(8) | 110.5(4) |
| O(1)-Zn(1)-O(2) | 109.5(3) | P(1)#1-O(1)-Zn(1) | 125.9(4) |
| O(1)-Zn(1)-O(3) | 108.4(3) | P(2)-O(2)-Zn(1) | 133.8(4) |
| O(2)-Zn(1)-O(3) | 117.1(3) | P(2)#2-O(3)-Zn(1) | 130.3(3) |
| O(1)-Zn(1)-O(4) | 109.5(3) | P(1)-O(4)-Zn(1) | 129.9(4) |
| Organic | | | |
| Moiety | Distance (Å) | Moiety | Angle (°) |
| N(1)-C(2) | 1.48(2) | C(2)-N(1)-C(3) | 112(2) |
| N(1)-C(3) | 1.58(3) | C(2)-C(1)-N(2) | 111.6(10) |
| N(2)-C(1) | 1.461(16) | C(1)-C(2)-N(1) | 112.1(12) |
| C(1)-C(2) | 1.458(17) |  |  |

Symmetry transformations used to generate equivalent atoms

#1 -x,-y+1,-z #2 -x+1,-y+1,-z

**Table S3.** Atomic coordinates [ x 104 ] and equivalent isotropic displacement parameters [Å2 x 103] for [C4N2H14][Zn5(PO4)4(H2O)], **II**.

| Atom | x | y | z | Ueq |
| --- | --- | --- | --- | --- |
| Zn(1) | -1490(1) | 2844(1) | -811(1) | 13(1) |
| Zn(2) | 1285(1) | 3490(1) | -988(1) | 13(1) |
| Zn(3) | -10(1) | 7253(1) | -652(1) | 13(1) |
| Zn(4) | -2466(1) | 7731(1) | -1123(1) | 13(1) |
| Zn(5) | -2502(1) | 6147(1) | 1225(1) | 14(1) |
| P(1) | -120(1) | 2497(3) | -1600(1) | 12(1) |
| P(2) | -2573(1) | 2641(3) | -2023(1) | 11(1) |
| P(3) | 1408(1) | -1486(3) | -16(1) | 11(1) |
| P(4) | -1394(1) | 7699(3) | 155(1) | 10(1) |
| O(17) | -1811(2) | 6247(7) | -445(2) | 15(1) |
| O(16) | 40(2) | 3018(8) | -2411(3) | 17(1) |
| O(15) | 1580(2) | 1322(7) | -171(2) | 17(1) |
| O(14) | 368(2) | 3998(7) | -1079(2) | 17(1) |
| O(13) | -1627(2) | 6940(8) | 935(2) | 16(1) |
| O(12) | -77(2) | 9661(9) | -1441(3) | 29(1) |
| O(11) | -1494(2) | 598(8) | 54(2) | 17(1) |
| O(10) | -698(2) | 6881(9) | 65(2) | 19(1) |
| O(9) | -2201(2) | 1231(7) | -1371(2) | 13(1) |
| O(8) | -2683(2) | 6629(9) | 2245(2) | 21(1) |
| O(7) | -2428(2) | 5479(8) | -1952(2) | 19(1) |
| O(6) | -3273(2) | 7318(8) | 717(2) | 18(1) |
| O(5) | -2512(2) | 2386(8) | 895(3) | 22(1) |
| O(4) | 1710(2) | 2961(8) | -1934(2) | 18(1) |
| O(3) | 690(2) | 8083(9) | 37(2) | 20(1) |
| O(2) | 1680(2) | 6838(8) | -669(2) | 16(1) |
| O(1) | -774(2) | 3637(9) | -1410(2) | 24(1) |
| N(2) | -729(2) | 3645(10) | 1791(3) | 21(1) |
| N(1) | 804(2) | 4645(10) | 1668(3) | 22(1) |
| C(2) | -207(3) | 2105(12) | 1438(4) | 26(1) |
| C(1) | 320(3) | 3673(14) | 1110(4) | 26(1) |
| C(4) | -1206(4) | 1958(15) | 2181(4) | 30(2) |
| C(3) | 1156(4) | 2593(15) | 2070(5) | 31(2) |

**Table S4.** Bond distances in [C4N2H14][Zn5(PO4)4(H2O)], **II**.

| Moiety | Distance (Å) | Moiety | Distance (Å) |
| --- | --- | --- | --- |
| Zn(1)-O(1) | 1.880(4) | Zn(5)-O(6) | 1.942(4) |
| Zn(1)-O(11) | 1.944(4) | Zn(5)-O(5) | 2.051(4) |
| Zn(1)-O(9) | 1.973(4) | P(1)-O(12)#3 | 1.510(5) |
| Zn(1)-O(17) | 2.008(4) | P(1)-O(16) | 1.515(5) |
| Zn(2)-O(14) | 1.929(4) | P(1)-O(1) | 1.521(4) |
| Zn(2)-O(4) | 1.932(4) | P(1)-O(14) | 1.585(4) |
| Zn(2)-O(15) | 1.949(4) | P(2)-O(8)#4 | 1.511(5) |
| Zn(2)-O(2) | 2.013(4) | P(2)-O(7) | 1.517(5) |
| Zn(3)-O(12) | 1.897(5) | P(2)-O(4)#5 | 1.528(4) |
| Zn(3)-O(10) | 1.932(4) | P(2)-O(9) | 1.583(4) |
| Zn(3)-O(3) | 1.955(4) | P(3)-O(3)#3 | 1.511(4) |
| Zn(3)-O(14) | 2.022(4) | P(3)-O(6)#6 | 1.533(4) |
| Zn(4)-O(7) | 1.896(4) | P(3)-O(15) | 1.534(4) |
| Zn(4)-O(9)#1 | 1.959(4) | P(3)-O(2)#3 | 1.565(4) |
| Zn(4)-O(2)#2 | 1.964(4) | P(4)-O(10) | 1.514(4) |
| Zn(4)-O(17) | 1.981(4) | P(4)-O(13) | 1.531(4) |
| Zn(5)-O(8) | 1.882(4) | P(4)-O(11)#1 | 1.538(4) |
| Zn(5)-O(13) | 1.934(4) | P(4)-O(17) | 1.575(4) |
| Organic | | | |
| Moiety | Distance (Å) | Moiety | Distance (Å) |
| N(2)-C(2) | 1.490(8) | N(1)-C(3) | 1.483(9) |
| N(2)-C(4) | 1.499(9) | N(1)-C(1) | 1.506(8) |
|  |  | C(2)-C(1) | 1.488(10) |

Symmetry transformations used to generate equivalent atoms

#1 x,y+1,z #2 x-1/2,-y+3/2,z #3 x,y-1,z #4 -x-1/2,y-1/2,z-1/2

#5 x-1/2,-y+1/2,z #6 x+1/2,-y+1/2,z #7 -x-1/2,y+1/2,z+1/2 #8 x+1/2,-y+3/2,z

**Table S5.** Bond angles in [C4N2H14][Zn5(PO4)4(H2O)], **II**.

| Moiety | Angle (°) | Moiety | Angle (°) |
| --- | --- | --- | --- |
| O(1)-Zn(1)-O(11) | 126.27(19) | O(8)#4-P(2)-O(9) | 107.8(2) |
| O(1)-Zn(1)-O(9) | 113.31(18) | O(7)-P(2)-O(9) | 107.1(2) |
| O(11)-Zn(1)-O(9) | 98.30(16) | O(4)#5-P(2)-O(9) | 107.6(2) |
| O(1)-Zn(1)-O(17) | 104.75(18) | O(3)#3-P(3)-O(6)#6 | 109.2(2) |
| O(11)-Zn(1)-O(17) | 105.77(17) | O(3)#3-P(3)-O(15) | 112.5(3) |
| O(9)-Zn(1)-O(17) | 107.15(15) | O(6)#6-P(3)-O(15) | 109.0(2) |
| O(14)-Zn(2)-O(4) | 113.37(18) | O(3)#3-P(3)-O(2)#3 | 108.6(2) |
| O(14)-Zn(2)-O(15) | 116.95(18) | O(6)#6-P(3)-O(2)#3 | 109.1(2) |
| O(4)-Zn(2)-O(15) | 115.61(18) | O(15)-P(3)-O(2)#3 | 108.4(2) |
| O(14)-Zn(2)-O(2) | 107.84(16) | O(10)-P(4)-O(13) | 109.0(2) |
| O(4)-Zn(2)-O(2) | 100.80(17) | O(10)-P(4)-O(11)#1 | 113.2(2) |
| O(15)-Zn(2)-O(2) | 99.41(17) | O(13)-P(4)-O(11)#1 | 108.6(2) |
| O(12)-Zn(3)-O(10) | 120.5(2) | O(10)-P(4)-O(17) | 108.5(2) |
| O(12)-Zn(3)-O(3) | 112.2(2) | O(13)-P(4)-O(17) | 108.9(2) |
| O(10)-Zn(3)-O(3) | 98.8(2) | O(11)#1-P(4)-O(17) | 108.6(2) |
| O(12)-Zn(3)-O(14) | 107.69(19) | P(4)-O(17)-Zn(4) | 127.4(2) |
| O(10)-Zn(3)-O(14) | 117.00(18) | P(4)-O(17)-Zn(1) | 117.7(2) |
| O(3)-Zn(3)-O(14) | 97.84(17) | Zn(4)-O(17)-Zn(1) | 111.95(18) |
| O(7)-Zn(4)-O(9)#1 | 112.92(17) | P(3)-O(15)-Zn(2) | 128.2(3) |
| O(7)-Zn(4)-O(2)#2 | 115.70(18) | P(1)-O(14)-Zn(2) | 127.8(2) |
| O(9)#1-Zn(4)-O(2)#2 | 103.92(17) | P(1)-O(14)-Zn(3) | 113.0(2) |
| O(7)-Zn(4)-O(17) | 102.06(17) | Zn(2)-O(14)-Zn(3) | 117.80(19) |
| O(9)#1-Zn(4)-O(17) | 108.13(16) | P(4)-O(13)-Zn(5) | 126.7(2) |
| O(2)#2-Zn(4)-O(17) | 114.20(17) | P(1)#1-O(12)-Zn(3) | 142.6(3) |
| O(8)-Zn(5)-O(13) | 114.90(19) | P(4)#3-O(11)-Zn(1) | 133.4(2) |
| O(8)-Zn(5)-O(6) | 104.32(19) | P(4)-O(10)-Zn(3) | 138.4(3) |
| O(13)-Zn(5)-O(6) | 125.55(19) | P(2)-O(9)-Zn(4)#3 | 117.6(2) |
| O(8)-Zn(5)-O(5) | 113.9(2) | P(2)-O(9)-Zn(1) | 122.8(2) |
| O(13)-Zn(5)-O(5) | 97.90(17) | Zn(4)#3-O(9)-Zn(1) | 119.54(19) |
| O(6)-Zn(5)-O(5) | 99.04(18) | P(2)#7-O(8)-Zn(5) | 144.9(3) |
| O(12)#3-P(1)-O(16) | 110.1(3) | P(2)-O(7)-Zn(4) | 131.5(3) |
| O(12)#3-P(1)-O(1) | 113.3(3) | P(3)#5-O(6)-Zn(5) | 131.9(3) |
| O(16)-P(1)-O(1) | 109.8(2) | P(2)#6-O(4)-Zn(2) | 124.4(3) |
| O(12)#3-P(1)-O(14) | 109.6(2) | P(3)#1-O(3)-Zn(3) | 136.7(3) |
| O(16)-P(1)-O(14) | 109.7(2) | P(3)#1-O(2)-Zn(4)#8 | 124.8(2) |
| O(1)-P(1)-O(14) | 104.2(2) | P(3)#1-O(2)-Zn(2) | 123.4(2) |
| O(8)#4-P(2)-O(7) | 110.1(3) | Zn(4)#8-O(2)-Zn(2) | 110.43(19) |
| O(8)#4-P(2)-O(4)#5 | 111.2(3) | P(1)-O(1)-Zn(1) | 138.4(3) |
| O(7)-P(2)-O(4)#5 | 112.7(2) |  |  |
| Organic | | | |
| Moiety | Angle (°) | Moiety | Angle (°) |
| C(2)-N(2)-C(4) | 111.2(5) | C(1)-C(2)-N(2) | 113.9(5) |
| C(3)-N(1)-C(1) | 114.1(5) | C(2)-C(1)-N(1) | 114.4(6) |

Symmetry transformations used to generate equivalent atoms

#1 x,y+1,z #2 x-1/2,-y+3/2,z #3 x,y-1,z #4 -x-1/2,y-1/2,z-1/2

#5 x-1/2,-y+1/2,z #6 x+1/2,-y+1/2,z #7 -x-1/2,y+1/2,z+1/2 #8 x+1/2,-y+3/2,z

**Table S6.** Atomic coordinates [ x 104 ] and equivalent isotropic displacement parameters [Å2 x 103] [NH4][H3O][Zn4(PO4)3]2.H2O, **III**.

| Atom | x | y | z | Ueq |
| --- | --- | --- | --- | --- |
| Zn(1) | 4498(1) | 216(1) | 7979(1) | 14(1) |
| Zn(2) | 8743(1) | -1918(1) | 8453(1) | 14(1) |
| Zn(3) | 589(2) | 3425(1) | 7238(1) | 15(1) |
| Zn(4) | 1446(1) | -1578(1) | 5402(1) | 14(1) |
| P(1) | 2403(3) | -3250(2) | 7145(1) | 11(1) |
| P(2) | 448(3) | 1669(2) | 9047(1) | 12(1) |
| P(3) | 4293(3) | 1739(2) | 6041(1) | 11(1) |
| O(1) | 3329(9) | 1518(5) | 8962(4) | 21(1) |
| O(2) | 8249(9) | 111(5) | 8623(4) | 21(1) |
| O(3) | 3717(9) | 306(5) | 6458(3) | 16(1) |
| O(4) | 2010(9) | -1800(4) | 7819(3) | 14(1) |
| O(5) | -620(10) | 2623(5) | 8349(4) | 21(1) |
| O(6) | 604(10) | 5452(5) | 7430(4) | 21(1) |
| O(7) | 3885(9) | 3002(5) | 6830(4) | 20(1) |
| O(8) | -2607(8) | 2158(5) | 5949(3) | 14(1) |
| O(9) | 1361(11) | -3303(5) | 5964(4) | 25(1) |
| O(10) | -2374(9) | -1395(6) | 5062(4) | 23(1) |
| O(11) | 5494(10) | -3180(6) | 7385(5) | 31(1) |
| O(12) | 450(10) | 2353(5) | 10185(4) | 21(1) |
| N(1) | 5000 | -5000 | 5000 | 40(3) |
| O(20) | -2690(60) | 4517(19) | 9640(30) | 72(13) |
| O(20A) | 5820(90) | 4630(20) | 8980(30) | 74(11) |

**Table S7.** Bond distances and angles in [NH4][H3O][Zn4(PO4)3]2.H2O, **III**.

| Moiety | Distance (Å) | Moiety | Distance (Å) |
| --- | --- | --- | --- |
| Zn(1)-O(1) | 1.893(5) | Zn(4)-O(3) | 1.989(4) |
| Zn(1)-O(2) | 1.953(5) | Zn(4)-O(8)#3 | 1.989(4) |
| Zn(1)-O(3) | 1.981(4) | P(1)-O(6)#4 | 1.512(4) |
| Zn(1)-O(4) | 1.988(4) | P(1)-O(11) | 1.512(5) |
| Zn(2)-O(12)#1 | 1.903(5) | P(1)-O(9) | 1.526(5) |
| Zn(2)-O(11) | 1.911(5) | P(1)-O(4) | 1.573(4) |
| Zn(2)-O(4)#2 | 1.970(4) | P(2)-O(12) | 1.511(5) |
| Zn(2)-O(2) | 1.993(5) | P(2)-O(1) | 1.515(5) |
| Zn(3)-O(5) | 1.907(5) | P(2)-O(5) | 1.526(5) |
| Zn(3)-O(6) | 1.908(4) | P(2)-O(2)#5 | 1.560(5) |
| Zn(3)-O(7) | 1.944(4) | P(3)-O(10)#3 | 1.508(5) |
| Zn(3)-O(8) | 2.046(4) | P(3)-O(7) | 1.515(5) |
| Zn(4)-O(9) | 1.930(5) | P(3)-O(8)#2 | 1.553(4) |
| Zn(4)-O(10) | 1.949(5) | P(3)-O(3) | 1.561(4) |
| Moiety | Angle (°) | Moiety | Angle (°) |
| O(1)-Zn(1)-O(2) | 110.0(2) | O(12)-P(2)-O(5) | 107.1(3) |
| O(1)-Zn(1)-O(3) | 118.2(2) | O(1)-P(2)-O(5) | 113.1(3) |
| O(2)-Zn(1)-O(3) | 117.1(2) | O(12)-P(2)-O(2)#5 | 110.5(3) |
| O(1)-Zn(1)-O(4) | 105.87(19) | O(1)-P(2)-O(2)#5 | 109.2(3) |
| O(2)-Zn(1)-O(4) | 103.99(19) | O(5)-P(2)-O(2)#5 | 105.2(3) |
| O(3)-Zn(1)-O(4) | 99.28(18) | O(10)#3-P(3)-O(7) | 113.3(3) |
| O(12)#1-Zn(2)-O(11) | 118.6(2) | O(10)#3-P(3)-O(8)#2 | 108.6(3) |
| O(12)#1-Zn(2)-O(4)#2 | 110.46(19) | O(7)-P(3)-O(8)#2 | 108.6(3) |
| O(11)-Zn(2)-O(4)#2 | 107.6(2) | O(10)#3-P(3)-O(3) | 107.8(3) |
| O(12)#1-Zn(2)-O(2) | 110.2(2) | O(7)-P(3)-O(3) | 109.6(3) |
| O(11)-Zn(2)-O(2) | 105.2(2) | O(8)#2-P(3)-O(3) | 108.8(3) |
| O(4)#2-Zn(2)-O(2) | 103.62(18) | P(2)-O(1)-Zn(1) | 132.3(3) |
| O(5)-Zn(3)-O(6) | 111.5(2) | P(2)#2-O(2)-Zn(1) | 112.6(3) |
| O(5)-Zn(3)-O(7) | 117.7(2) | P(2)#2-O(2)-Zn(2) | 130.9(3) |
| O(6)-Zn(3)-O(7) | 114.3(2) | Zn(1)-O(2)-Zn(2) | 115.9(2) |
| O(5)-Zn(3)-O(8) | 99.9(2) | P(3)-O(3)-Zn(1) | 126.2(3) |
| O(6)-Zn(3)-O(8) | 109.3(2) | P(3)-O(3)-Zn(4) | 117.4(3) |
| O(7)-Zn(3)-O(8) | 102.26(18) | Zn(1)-O(3)-Zn(4) | 115.7(2) |
| O(9)-Zn(4)-O(10) | 108.3(2) | P(1)-O(4)-Zn(2)#5 | 119.8(2) |
| O(9)-Zn(4)-O(3) | 113.2(2) | P(1)-O(4)-Zn(1) | 123.3(2) |
| O(10)-Zn(4)-O(3) | 105.3(2) | Zn(2)#5-O(4)-Zn(1) | 116.8(2) |
| O(9)-Zn(4)-O(8)#3 | 101.6(2) | P(2)-O(5)-Zn(3) | 134.1(3) |
| O(10)-Zn(4)-O(8)#3 | 109.53(19) | P(1)#6-O(6)-Zn(3) | 132.6(3) |
| O(3)-Zn(4)-O(8)#3 | 118.60(18) | P(3)-O(7)-Zn(3) | 133.3(3) |
| O(6)#4-P(1)-O(11) | 113.0(3) | P(3)#5-O(8)-Zn(4)#3 | 123.7(2) |
| O(6)#4-P(1)-O(9) | 110.3(3) | P(3)#5-O(8)-Zn(3) | 121.0(2) |
| O(11)-P(1)-O(9) | 109.5(3) | Zn(4)#3-O(8)-Zn(3) | 115.25(19) |
| O(6)#4-P(1)-O(4) | 107.2(2) | P(1)-O(9)-Zn(4) | 124.4(3) |
| O(11)-P(1)-O(4) | 109.3(3) | P(3)#3-O(10)-Zn(4) | 126.5(3) |
| O(9)-P(1)-O(4) | 107.3(3) | P(1)-O(11)-Zn(2) | 133.8(3) |
| O(12)-P(2)-O(1) | 111.5(3) | P(2)-O(12)-Zn(2)#1 | 137.2(3) |

Symmetry transformations used to generate equivalent atoms

#1 -x+1,-y,-z+2 #2 x+1,y,z #3 -x,-y,-z+1 #4 x,y-1,z #5 x-1,y,z #6 x,y+1,z

**Table S8.** Atomic coordinates [ x 104 ] and equivalent isotropic displacement parameters [Å2 x 103] for [C5N2H14][Co(HPO4)2], **IV**.

| Atom | x | y | z | Ueq |
| --- | --- | --- | --- | --- |
| Co(1) | 0 | 4696(1) | -7500 | 18(1) |
| P(1) | -1425(1) | 3701(1) | -4514(1) | 18(1) |
| O(1) | 1252(2) | 5477(1) | -6730(3) | 30(1) |
| O(2) | -556(2) | 3732(1) | -5900(2) | 28(1) |
| O(3) | -1383(2) | 2720(1) | -3660(2) | 25(1) |
| O(4) | -2621(2) | 3864(1) | -5327(3) | 30(1) |
| N(1) | 1390(2) | 2829(2) | -4744(3) | 33(1) |
| C(1) | 1585(3) | 1866(3) | -5529(4) | 37(1) |
| C(2) | 2296(3) | 3525(2) | -5087(4) | 36(1) |
| C(3) | 709(7) | 1183(6) | -5136(13) | 148(4) |

**Table S9.** Bond distances and angles in [C5N2H14][Co(HPO4)2], **IV**.

| Moiety | Distance (Å) | Moiety | Angle (°) |
| --- | --- | --- | --- |
| Co(1)-O(1) | 1.929(2) | O(1)#1-Co(1)-O(2) | 108.10(8) |
| Co(1)-O(1)#1 | 1.929(2) | O(1)-Co(1)-O(2)#1 | 108.10(8) |
| Co(1)-O(2) | 1.9681(18) | O(1)#1-Co(1)-O(2)#1 | 116.38(9) |
| Co(1)-O(2)#1 | 1.9681(18) | O(2)-Co(1)-O(2)#1 | 94.92(12) |
| P(1)-O(3) | 1.5144(19) | O(3)-P(1)-O(1)#2 | 112.05(11) |
| P(1)-O(1)#2 | 1.516(2) | O(3)-P(1)-O(2) | 109.43(11) |
| P(1)-O(2) | 1.5333(19) | O(1)#2-P(1)-O(2) | 111.37(12) |
| P(1)-O(4) | 1.5686(19) | O(3)-P(1)-O(4) | 109.39(11) |
|  |  | O(1)#2-P(1)-O(4) | 105.51(12) |
| Moiety | Angle (°) | O(2)-P(1)-O(4) | 108.99(12) |
| O(1)-Co(1)-O(1)#1 | 112.13(13) | P(1)#2-O(1)-Co(1) | 135.72(13) |
| O(1)-Co(1)-O(2) | 116.38(9) | P(1)-O(2)-Co(1) | 136.85(12) |
| Organic | | | |
| Moiety | Distance (Å) | Moiety | Angle (°) |
| N(1)-C(2) | 1.477(4) | C(2)-N(1)-C(1) | 112.3(2) |
| N(1)-C(1) | 1.489(4) | C(3)-C(1)-N(1) | 111.7(4) |
| C(1)-C(3) | 1.448(9) | C(3)-C(1)-C(2)#3 | 109.6(5) |
| C(1)-C(2)#3 | 1.510(4) | N(1)-C(1)-C(2)#3 | 109.3(3) |
| C(2)-C(1)#3 | 1.510(4) | N(1)-C(2)-C(1)#3 | 110.7(3) |

Symmetry transformations used to generate equivalent atoms

#1 -x,y,-z-3/2 #2 -x,-y+1,-z-1 #3 -x+1/2,-y+1/2,-z-1

**Table S10.** Atomic coordinates [ x 104 ] and equivalent isotropic displacement parameters [Å2 x 103] for [C5N2H14][Co(HPO4)2], **V**.

| Atom | x | y | z | Ueq |
| --- | --- | --- | --- | --- |
| Co(1) | 2372(1) | 282(1) | 9697(1) | 21(1) |
| P(1) | 397(1) | 815(1) | 11892(1) | 22(1) |
| P(2) | 5484(1) | 884(1) | 8581(1) | 21(1) |
| O(1) | 3896(2) | 1125(2) | 9001(2) | 29(1) |
| O(2) | 1150(2) | 1117(2) | 10729(2) | 29(1) |
| O(3) | 3203(2) | -994(2) | 10363(2) | 28(1) |
| O(4) | 709(3) | 67(2) | 8328(2) | 31(1) |
| O(5) | -440(3) | 1684(2) | 12419(2) | 34(1) |
| O(6) | 1744(3) | 479(2) | 12897(2) | 35(1) |
| O(7) | 5600(3) | -147(2) | 8022(2) | 32(1) |
| O(8) | 5853(3) | 1653(2) | 7559(2) | 35(1) |
| N(1) | 1459(3) | 3316(2) | 7562(3) | 29(1) |
| N(2) | -762(3) | 2051(3) | 8501(4) | 59(1) |
| C(1) | 1367(4) | 3246(3) | 8919(3) | 37(1) |
| C(2) | -270(4) | 2962(3) | 9184(4) | 48(1) |
| C(3) | -682(5) | 2137(3) | 7165(5) | 56(1) |
| C(4) | 963(5) | 2399(3) | 6879(4) | 43(1) |
| C(5) | 1849(6) | 4211(4) | 9538(4) | 72(2) |

**Table S11.** Bond distances and angles in [C5N2H14][Co(HPO4)2], **V**.

| Moiety | Distance (Å) | Moiety | Angle (°) |
| --- | --- | --- | --- |
| Co(1)-O(1) | 1.939(2) | O(2)-Co(1)-O(4) | 96.88(10) |
| Co(1)-O(2) | 1.959(2) | O(3)-Co(1)-O(4) | 110.92(9) |
| Co(1)-O(3) | 1.969(2) | O(5)-P(1)-O(2) | 111.13(13) |
| Co(1)-O(4) | 1.978(2) | O(5)-P(1)-O(4)#1 | 110.30(13) |
| P(1)-O(5) | 1.512(2) | O(2)-P(1)-O(4)#1 | 112.81(13) |
| P(1)-O(2) | 1.523(2) | O(5)-P(1)-O(6) | 107.91(14) |
| P(1)-O(4)#1 | 1.525(2) | O(2)-P(1)-O(6) | 107.54(12) |
| P(1)-O(6) | 1.577(2) | O(4)#1-P(1)-O(6) | 106.89(13) |
| P(2)-O(1) | 1.516(2) | O(1)-P(2)-O(7) | 114.19(13) |
| P(2)-O(7) | 1.519(2) | O(1)-P(2)-O(3)#2 | 112.16(13) |
| P(2)-O(3)#2 | 1.534(2) | O(7)-P(2)-O(3)#2 | 108.20(13) |
| P(2)-O(8) | 1.567(2) | O(1)-P(2)-O(8) | 108.59(12) |
|  |  | O(7)-P(2)-O(8) | 107.28(13) |
| Moiety | Angle (°) | O(3)#2-P(2)-O(8) | 105.99(13) |
| O(1)-Co(1)-O(2) | 107.85(9) | P(2)-O(1)-Co(1) | 130.83(13) |
| O(1)-Co(1)-O(3) | 114.56(9) | P(1)-O(2)-Co(1) | 127.71(13) |
| O(2)-Co(1)-O(3) | 119.19(9) | P(2)#2-O(3)-Co(1) | 113.77(13) |
| O(1)-Co(1)-O(4) | 105.26(10) | P(1)#1-O(4)-Co(1) | 128.74(14) |
| Organic | | | |
| Moiety | Distance (Å) | Moiety | Angle (°) |
| N(1)-C(4) | 1.478(4) | C(4)-N(1)-C(1) | 113.7(3) |
| N(1)-C(1) | 1.479(4) | C(3)-N(2)-C(2) | 113.1(3) |
| N(2)-C(3) | 1.456(6) | N(1)-C(1)-C(5) | 110.4(3) |
| N(2)-C(2) | 1.471(5) | N(1)-C(1)-C(2) | 110.1(3) |
| C(1)-C(5) | 1.500(6) | C(5)-C(1)-C(2) | 110.9(4) |
| C(1)-C(2) | 1.514(5) | N(2)-C(2)-C(1) | 110.1(3) |
| C(3)-C(4) | 1.519(5) | N(2)-C(3)-C(4) | 110.7(3) |
|  |  | N(1)-C(4)-C(3) | 108.8(3) |

Symmetry transformations used to generate equivalent atoms

#1 -x,-y,-z+2 #2 -x+1,-y,-z+2

**Table S12.** Atomic coordinates [ x 104 ] and equivalent isotropic displacement parameters [Å2 x 103] for [C4N2H12]3 [Co2(OH)(HPO4)3]2 , **VI**.

| Atom | x | y | z | Ueq |
| --- | --- | --- | --- | --- |
| Co(1) | 7113(1) | 732(1) | 349(1) | 13(1) |
| Co(2) | 12097(1) | 847(1) | 471(1) | 13(1) |
| P(1) | 9723(2) | 1497(1) | 2615(1) | 14(1) |
| P(2) | 14352(2) | 1379(1) | -1991(1) | 13(1) |
| P(3) | 10256(2) | 262(1) | -1668(1) | 12(1) |
| O(1) | 6167(4) | 1160(2) | -1332(3) | 23(1) |
| O(2) | 14621(10) | 643(3) | 1132(7) | 4(2) |
| O(2A) | 14640(10) | 765(3) | 1237(7) | 1(2) |
| O(3) | 7843(4) | -53(1) | 1127(3) | 17(1) |
| O(4) | 7982(4) | 1334(1) | 1760(3) | 20(1) |
| O(5) | 9629(4) | 716(1) | -638(3) | 15(1) |
| O(6) | 11395(4) | 1513(1) | 1738(3) | 19(1) |
| O(7) | 12880(4) | 1464(1) | -961(3) | 16(1) |
| O(8) | 11174(4) | 211(1) | 1920(3) | 16(1) |
| O(9) | 9472(5) | 2050(1) | 3394(3) | 21(1) |
| O(10) | 10080(5) | 1013(2) | 3741(3) | 27(1) |
| O(11) | 13675(5) | 983(2) | -3159(3) | 21(1) |
| O(12) | 14745(5) | 1974(2) | -2685(3) | 24(1) |
| O(13) | 10467(5) | 569(2) | -3064(3) | 20(1) |
| N(1) | 5273(7) | 2444(2) | 1452(5) | 38(1) |
| N(2) | 3902(7) | 2664(2) | 4073(5) | 36(1) |
| N(3) | 4361(6) | -26(2) | 3599(4) | 22(1) |
| C(1) | 4874(6) | 1964(2) | 2374(4) | 12(1) |
| C(2) | 5086(7) | 2145(2) | 3831(5) | 24(1) |
| C(3) | 4310(6) | 3150(2) | 3150(4) | 13(1) |
| C(4) | 4097(7) | 2972(2) | 1685(5) | 24(1) |
| C(5) | 5579(8) | 455(2) | 4114(5) | 29(1) |
| C(6) | 3211(7) | -248(3) | 4697(5) | 29(1) |

**Table S13.** Bond distances and angles in [C4N2H12]3 [Co2(OH)(HPO4)3]2 , **VI**.

| Moiety | Distance (Å) | Moiety | Angle (°) |
| --- | --- | --- | --- |
| Co(1)-O(1) | 2.018(3) | O(4)-Co(1)-O(5) | 94.74(12) |
| Co(1)-O(2)#1 | 2.019(7) | O(2A)#1-Co(1)-O(5) | 177.7(2) |
| Co(1)-O(3) | 2.024(3) | O(2A)-Co(2)-O(2) | 8.8(3) |
| Co(1)-O(4) | 2.039(3) | O(2A)-Co(2)-O(6) | 95.5(2) |
| Co(1)-O(2A)#1 | 2.045(7) | O(2)-Co(2)-O(6) | 103.5(2) |
| Co(1)-O(5) | 2.121(3) | O(2A)-Co(2)-O(5) | 163.2(2) |
| Co(2)-O(2A) | 1.969(7) | O(2)-Co(2)-O(5) | 154.7(2) |
| Co(2)-O(2) | 1.972(7) | O(6)-Co(2)-O(5) | 101.09(13) |
| Co(2)-O(6) | 2.062(3) | O(2A)-Co(2)-O(7) | 92.2(2) |
| Co(2)-O(5) | 2.073(3) | O(2)-Co(2)-O(7) | 95.8(2) |
| Co(2)-O(7) | 2.105(3) | O(6)-Co(2)-O(7) | 89.40(13) |
| Co(2)-O(8) | 2.179(3) | O(5)-Co(2)-O(7) | 90.10(12) |
| P(1)-O(9) | 1.504(3) | O(2A)-Co(2)-O(8) | 90.0(2) |
| P(1)-O(4) | 1.530(3) | O(2)-Co(2)-O(8) | 86.4(2) |
| P(1)-O(6) | 1.532(3) | O(6)-Co(2)-O(8) | 90.40(13) |
| P(1)-O(10) | 1.585(3) | O(5)-Co(2)-O(8) | 87.72(12) |
| P(2)-O(1)#2 | 1.526(3) | O(7)-Co(2)-O(8) | 177.73(12) |
| P(2)-O(7) | 1.529(3) | O(9)-P(1)-O(4) | 111.8(2) |
| P(2)-O(11) | 1.529(3) | O(9)-P(1)-O(6) | 112.98(19) |
| P(2)-O(12) | 1.566(3) | O(4)-P(1)-O(6) | 110.67(18) |
| P(3)-O(8)#3 | 1.517(3) | O(9)-P(1)-O(10) | 104.8(2) |
| P(3)-O(3)#3 | 1.533(3) | O(4)-P(1)-O(10) | 108.3(2) |
| P(3)-O(5) | 1.544(3) | O(6)-P(1)-O(10) | 108.0(2) |
| P(3)-O(13) | 1.565(3) | O(1)#2-P(2)-O(7) | 112.33(18) |
|  |  | O(1)#2-P(2)-O(11) | 111.1(2) |
| Moiety | Angle (°) | O(7)-P(2)-O(11) | 111.65(18) |
| O(1)-Co(1)-O(2)#1 | 95.3(2) | O(1)#2-P(2)-O(12) | 107.6(2) |
| O(1)-Co(1)-O(3) | 144.88(14) | O(7)-P(2)-O(12) | 109.29(19) |
| O(2)#1-Co(1)-O(3) | 89.2(2) | O(11)-P(2)-O(12) | 104.51(19) |
| O(1)-Co(1)-O(4) | 108.05(14) | O(8)#3-P(3)-O(3)#3 | 115.47(19) |
| O(2)#1-Co(1)-O(4) | 93.4(2) | O(8)#3-P(3)-O(5) | 111.67(18) |
| O(3)-Co(1)-O(4) | 106.41(13) | O(3)#3-P(3)-O(5) | 106.03(18) |
| O(1)-Co(1)-O(2A)#1 | 93.8(2) | O(8)#3-P(3)-O(13) | 106.22(18) |
| O(3)-Co(1)-O(2A)#1 | 95.1(2) | O(3)#3-P(3)-O(13) | 108.58(18) |
| O(4)-Co(1)-O(2A)#1 | 86.0(2) | O(5)-P(3)-O(13) | 108.72(18) |
| O(1)-Co(1)-O(5) | 83.95(13) | Co(2)-O(2)-Co(1)#2 | 133.5(4) |
| O(2)#1-Co(1)-O(5) | 171.6(2) | Co(2)-O(2A)-Co(1)#2 | 132.0(4) |
| O(3)-Co(1)-O(5) | 86.73(12) | Co(2)-O(5)-Co(1) | 119.94(15) |
| Organic | | | |
| Moiety | Distance (Å) | Moiety | Angle (°) |
| N(1)-C(1) | 1.471(6) | C(1)-N(1)-C(4) | 112.2(4) |
| N(1)-C(4) | 1.511(7) | C(3)-N(2)-C(2) | 111.5(4) |
| N(2)-C(3) | 1.483(6) | C(5)-N(3)-C(6) | 110.6(4) |
| N(2)-C(2) | 1.500(7) | N(1)-C(1)-C(2) | 111.9(4) |
| N(3)-C(5) | 1.490(6) | C(1)-C(2)-N(2) | 110.1(4) |
| N(3)-C(6) | 1.495(7) | N(2)-C(3)-C(4) | 111.8(4) |
| C(1)-C(2) | 1.497(6) | C(3)-C(4)-N(1) | 109.6(4) |
| C(3)-C(4) | 1.503(6) | N(3)-C(5)-C(6)#4 | 110.0(4) |
| C(5)-C(6)#4 | 1.506(7) | N(3)-C(6)-C(5)#4 | 110.3(4) |

Symmetry transformations used to generate equivalent atoms

#1 x-1,y,z, #2 x+1,y,z #3 -x+2,-y,-z #4 -x+1,-y,-z+1

**Table S14.** Atomic coordinates [ x 104 ] and equivalent isotropic displacement parameters [Å2 x 103] for [C4N2H12][Co2(PO4)2], **VII**.

| Atom | x | y | z | Ueq |
| --- | --- | --- | --- | --- |
| Co(1) | 2014(1) | 5010(1) | 6422(1) | 15(1) |
| Co(2) | -2969(1) | 4928(1) | 8590(1) | 15(1) |
| P(1) | -2244(2) | 3240(1) | 6731(1) | 13(1) |
| P(2) | 1741(2) | 6702(1) | 8246(1) | 13(1) |
| O(1) | 1140(7) | 6462(4) | 4659(3) | 24(1) |
| O(2) | 4753(6) | 3468(4) | 6686(4) | 25(1) |
| O(3) | -1202(6) | 4249(3) | 7260(3) | 19(1) |
| O(4) | 3389(6) | 5648(4) | 7757(3) | 20(1) |
| O(5) | -2958(7) | 3536(3) | 10391(3) | 23(1) |
| O(6) | -1108(6) | 6453(4) | 8320(4) | 26(1) |
| O(7) | -1328(7) | 1757(3) | 7704(3) | 22(1) |
| O(8) | 1843(7) | 8157(3) | 7224(3) | 23(1) |
| N(1) | 3372(8) | 961(4) | 8872(4) | 24(1) |
| N(2) | -3627(9) | 8899(4) | 6106(4) | 28(1) |
| C(1) | 3666(10) | 1248(5) | 10088(5) | 24(1) |
| C(2) | 3677(9) | -545(5) | 9222(5) | 23(1) |
| C(3) | -3505(10) | 10331(5) | 5891(5) | 24(1) |
| C(4) | -3997(11) | 8757(6) | 4810(6) | 28(1) |

**Table S15.** Bond distances in [C4N2H12][Co2(PO4)2], **VII**.

| Moiety | Distance (Å) | Moiety | Distance (Å) |
| --- | --- | --- | --- |
| Co(1)-O(1) | 1.930(3) | P(1)-O(1)#2 | 1.527(3) |
| Co(1)-O(2) | 1.945(3) | P(1)-O(7) | 1.527(3) |
| Co(1)-O(3) | 1.997(3) | P(1)-O(2)#1 | 1.530(3) |
| Co(1)-O(4) | 2.009(3) | P(1)-O(3) | 1.572(3) |
| Co(2)-O(5) | 1.925(3) | P(2)-O(8) | 1.520(4) |
| Co(2)-O(6) | 1.940(4) | P(2)-O(5)#3 | 1.524(3) |
| Co(2)-O(4)#1 | 2.003(3) | P(2)-O(6) | 1.525(3) |
| Co(2)-O(3) | 2.011(3) | P(2)-O(4) | 1.573(3) |
| Organic | | | |
| Moiety | Distance (Å) | Moiety | Distance (Å) |
| N(1)-C(1) | 1.482(6) | C(1)-C(2)#5 | 1.512(6) |
| N(1)-C(2) | 1.493(6) | C(2)-C(1)#5 | 1.512(6) |
| N(2)-C(3) | 1.474(7) | C(3)-C(4)#6 | 1.506(7) |
| N(2)-C(4) | 1.490(7) | C(4)-C(3)#6 | 1.506(7) |

Symmetry transformations used to generate equivalent atoms

#1 x-1,y,z #2 -x,-y+1,-z+1 #3 -x,-y+1,-z+2 #4 x+1,y,z #5 -x+1,-y,-z+2

#6 -x-1,-y+2,-z+1

**Table S16.** Bond angles in [C4N2H12][Co2(PO4)2], **VII**.

| Moiety | Angle (°) | Moiety | Angle (°) |
| --- | --- | --- | --- |
| O(1)-Co(1)-O(2) | 121.18(16) | O(2)#1-P(1)-O(3) | 109.36(18) |
| O(1)-Co(1)-O(3) | 110.47(15) | O(8)-P(2)-O(5)#3 | 111.1(2) |
| O(2)-Co(1)-O(3) | 107.64(15) | O(8)-P(2)-O(6) | 108.2(2) |
| O(1)-Co(1)-O(4) | 113.49(15) | O(5)#3-P(2)-O(6) | 112.9(2) |
| O(2)-Co(1)-O(4) | 98.85(13) | O(8)-P(2)-O(4) | 109.7(2) |
| O(3)-Co(1)-O(4) | 103.35(13) | O(5)#3-P(2)-O(4) | 106.84(18) |
| O(5)-Co(2)-O(6) | 117.75(16) | O(6)-P(2)-O(4) | 108.07(19) |
| O(5)-Co(2)-O(4)#1 | 111.89(16) | P(1)#2-O(1)-Co(1) | 133.6(2) |
| O(6)-Co(2)-O(4)#1 | 109.43(14) | P(1)#4-O(2)-Co(1) | 135.8(2) |
| O(5)-Co(2)-O(3) | 114.24(14) | P(1)-O(3)-Co(1) | 116.13(17) |
| O(6)-Co(2)-O(3) | 100.01(14) | P(1)-O(3)-Co(2) | 125.60(19) |
| O(4)#1-Co(2)-O(3) | 101.84(13) | Co(1)-O(3)-Co(2) | 118.11(16) |
| O(1)#2-P(1)-O(7) | 111.2(2) | P(2)-O(4)-Co(2)#4 | 115.23(17) |
| O(1)#2-P(1)-O(2)#1 | 112.6(2) | P(2)-O(4)-Co(1) | 123.90(18) |
| O(7)-P(1)-O(2)#1 | 107.2(2) | Co(2)#4-O(4)-Co(1) | 120.87(15) |
| O(1)#2-P(1)-O(3) | 106.55(19) | P(2)#3-O(5)-Co(2) | 134.8(2) |
| O(7)-P(1)-O(3) | 109.93(19) | P(2)-O(6)-Co(2) | 137.0(2) |
| Organic | | | |
| Moiety | Angle (°) | Moiety | Angle (°) |
| C(1)-N(1)-C(2) | 111.4(4) | N(1)-C(2)-C(1)#5 | 110.6(4) |
| C(3)-N(2)-C(4) | 111.9(4) | N(2)-C(3)-C(4)#6 | 110.4(4) |
| N(1)-C(1)-C(2)#5 | 109.0(4) | N(2)-C(4)-C(3)#6 | 107.9(4) |

Symmetry transformations used to generate equivalent atoms

#1 x-1,y,z #2 -x,-y+1,-z+1 #3 -x,-y+1,-z+2 #4 x+1,y,z #5 -x+1,-y,-z+2

#6 -x-1,-y+2,-z+1
